# Supplementary material for: Effect of a Carotenoid Extract from Citrus reticulata By-Products on the Immune-Oxidative Status of Broilers
Source: MDPI journal article supplement (doi:10.3390/antiox11010144), 2022-01-10
Supplement: s1 [file s1]

**Table S1.** The mean individual fatty acids (FA) (% of total FA) in breast meat of chickens fed the CON and CEO diets at 42<sup>nd</sup> day.

| Fatty acids                                   | Dietary treatment |       |       | Significance |
|-----------------------------------------------|-------------------|-------|-------|--------------|
|                                               | CON               | CCE   | SEM   |              |
| Myristic acid (C <sub>14:0</sub> )            | 0.325             | 0.297 | 0.008 | 0.560        |
| Pentadecanoic acid (C <sub>15:0</sub> )       | 0.23              | 0.19  | 0.009 | 0.409        |
| Palmitic acid (C <sub>16:0</sub> )            | 17.12             | 16.74 | 0.85  | 0.394        |
| Palmitoleic acid (C <sub>16:1 n-7</sub> )     | 1.18              | 1.27  | 0.27  | 0.522        |
| Margaric acid (C <sub>17:0</sub> )            | 0.12              | 0.11  | 0.05  | 0.704        |
| Stearic acid (C <sub>18:0</sub> )             | 8.16              | 7.91  | 0.72  | 0.498        |
| C <sub>18:1 trans</sub>                       | 0.02              | 0.047 | 0.07  | 0.499        |
| Oleic acid (C <sub>18:1 cis-9</sub> )         | 23.93             | 23.23 | 1.428 | 0.346        |
| cis-Vaccenic acid (C <sub>18:1 cis-11</sub> ) | 1.693             | 1.698 | 0.112 | 0.931        |
| Linoleic acid (C <sub>18:2 n-6 cis</sub> )    | 32.16             | 33.26 | 2.214 | 0.323        |
| α- Linolenic acid (C <sub>18:3 n-3</sub> )    | 2.835             | 2.933 | 0.434 | 0.657        |
| γ- Linolenic acid (C <sub>18:3 n-6</sub> )    | 0.20              | 0.245 | 0.098 | 0.363        |
| Eicosadienoic acid (C <sub>20:2 n-6</sub> )   | 0.74              | 0.656 | 0.119 | 0.184        |
| Eicosatrienoic acid (C <sub>20:3 n-6</sub> )  | 0.702             | 0.776 | 0.168 | 0.393        |
| Arachidonic acid (C <sub>20:4 n-6</sub> )     | 9.04              | 9.13  | 2.034 | 0.942        |
| Docosadienoic acid (C <sub>22:2 n-6</sub> )   | 0.164             | 0.170 | 0.074 | 0.872        |
| Eicosapentanoic acid (C <sub>22:5 n-6</sub> ) | 0.791             | 0.822 | 0.201 | 0.770        |
| Docosahexaenoic acid (C <sub>22:6 n-3</sub> ) | 0.532             | 0.456 | 0.185 | 0.459        |
| Saturated fatty acids (SFA)                   | 25.96             | 25.24 | 1.301 | 0.290        |
| Unsaturated fatty acids (USFA)                | 73.99             | 74.69 | 1.346 | 0.313        |
| SFA/ UNFA                                     | 0.351             | 0.338 | 0.024 | 0.296        |
| Monounsaturated fatty acids (MUFA)            | 26.82             | 26.25 | 1.649 | 0.499        |
| Polyunsaturated fatty acids (PUFA)            | 47.17             | 48.45 | 1.689 | <b>0.096</b> |
| Atherogenic Index (AI)                        | 0.25              | 0.24  | 0.017 | 0.321        |

Atherogenicity index (AI) was calculated according to the equation: (C<sub>12:0</sub> + 4 × C<sub>14:0</sub> + C<sub>16:0</sub>)/(PUFA + MUFA), as described by Mavrommatis et al. [1].

1. Mavrommatis, A.; Sotirakoglou, K.; Kamilaris, C.; Tsiplakou, E. Effects of Inclusion of *Schizochytrium* spp. and Forage-to-Concentrate Ratios on Goats' Milk Quality and Oxidative Status. *Foods* **2021**, *10*, 1322, doi:10.3390/foods10061322.
